# Supplementary material for: Customized nutrient management of onion (Alium cepa) agroecosystems
Source: Research Square preprint supplement (doi:10.21203/rs.3.rs-2556545/v1), 2023-03-18
Supplement: Supplementary file 1 [file d534a634b7bea07b60fdd459.docx]

Supplementary material S1. Nutrient standards as *clr* values at high yield level (> 50 ton ha-1). The filling value (Fv) is computed by difference between the measurement unit and the sum of quantified elements. Centroids are mean *clr* values back-transformed into concentration values.

| **Nutrient** | **Cataé** | | | **Mulata** | | | **Omega** | | | **SCS373 Valessul** | | |
| --- | --- | --- | --- | --- | --- | --- | --- | --- | --- | --- | --- | --- |
| Mean | SD | Centroid | Mean | SD | Centroid | Mean | SD | Centroid | Mean | SD | Centroid |
|  |  | g kg-1 |  |  | g kg-1 |  |  | g kg-1 |  |  | g kg-1 |
| **N** | 2.897 | 0.123 | 30.7 | 3.376 | 0.113 | 37.2 | 3.143 | 0.184 | 25.6 | 3.217 | 0.150 | 26.8 |
| **P** | 0.931 | 0.249 | 4.3 | 1.050 | 0.149 | 3.6 | 1.105 | 0.174 | 3.3 | 1.889 | 0.082 | 7.1 |
| **K** | 2.717 | 0.105 | 25.7 | 3.437 | 0.181 | 39.5 | 3.303 | 0.205 | 30.1 | 3.274 | 0.133 | 28.4 |
| **Ca** | 1.781 | 0.105 | 10.1 | 2.643 | 0.222 | 17.9 | 2.675 | 0.275 | 16.1 | 2.064 | 0.175 | 8.5 |
| **Mg** | 0.678 | 0.111 | 3.3 | 0.811 | 0.235 | 2.9 | 0.967 | 0.270 | 2.9 | 0.892 | 0.091 | 2.6 |
| **S** | 1.512 | 0.205 | 7.7 | 0.923 | 0.269 | 3.2 | 0.962 | 0.274 | 2.9 | 1.422 | 0.174 | 4.4 |
| **Zn** | -3.793 | 0.217 | 0.038 | -3.713 | 0.275 | 0.031 | -3.577 | 0.224 | 0.031 | -4.018 | 0.148 | 0.019 |
| **Cu** | -3.900 | 0.164 | 0.034 | -4.634 | 0.614 | 0.012 | -4.950 | 0.635 | 0.008 | -4.542 | 0.478 | 0.011 |
| **Mn** | -3.286 | 0.149 | 0.063 | -3.538 | 0.385 | 0.037 | -3.546 | 0.443 | 0.032 | -3.829 | 0.147 | 0.023 |
| **B** | -2.580 | 0.696 | 0.129 | -2.740 | 0.229 | 0.082 | -2.863 | 0.268 | 0.063 | -4.021 | 0.222 | 0.019 |
| **Fe** | -3.251 | 0.367 | 0.066 | -4.172 | 0.510 | 0.020 | -3.941 | 0.532 | 0.021 | -3.102 | 0.147 | 0.048 |
| **Fv** | 6.294 | 0.114 | 917.9 | 6.557 | 0.094 | 895.5 | 6.722 | 0.112 | 918.9 | 6.756 | 0.111 | 922.1 |

Supplementary material S2. Results of soil analysis.

| Variable | Unit | Minimum | Medium | Maximum |
| --- | --- | --- | --- | --- |
| Clay content | % | 15 | 38 | 67 |
| Soil organic matter | % | 2.2 | 3.5 | 5.8 |
| pHwater | - | 5.1 | 5.9 | 6.9 |
| Soil test P | mg dm-3 | 3.2 | 22.0 | 77.7 |
| Soil test K | mg dm-3 | 59 | 192 | 936 |
| Soil test Ca | cmolc dm-3 | 5.0 | 7.4 | 15.3 |
| Soil test Mg | cmolc dm-3 | 2.2 | 3.3 | 5.9 |
| Cation exchange capacity | cmolc dm-3 | 11.7 | 16.3 | 25.0 |
| Base saturation | % | 55.8 | 76.2 | 88.8 |
| Soil test S | mg dm-3 | 12.5 | 22.5 | 96.6 |
| Soil test Zn | mg dm-3 | 2.0 | 2.8 | 10.3 |
| Soil test Cu | mg dm-3 | 0.4 | 5.0 | 13.1 |
| Soil test Mn | mg dm-3 | 0.1 | 18.3 | 64.2 |
| Soil test B | mg dm-3 | 0.0 | 1.0 | 1.4 |
| Soil test Fe | mg dm-3 | 28 | 105 | 246 |

Supplementary material S3. Cultivar and preceding crop

| Year | #site | Cultivar | Bulb color | Crop establsihment | Soil management | Preceding crop |
| --- | --- | --- | --- | --- | --- | --- |
| 2007 | 4 | ‘Bola Precoce’ | Yellow | Machine transplanting | No-till | Black oat (*Avena sativa*) |
| 2008 | 4 | ‘Bola Precoce’ | Yellow | Machine transplanting | No-till, conventional | Sweet potato (*Ipomoea batatas*) |
| 2009 | 3 | ‘Bola Precoce’  ‘Bola Precoce’ | Yellow  Yellow | Machine transplanting  Machine transplanting | Conventional  Conventional | Millet (*Pennisetum glaucum*)  Tobacco (*Nicotiana tabacum*) |
| 2011 | 2 | ‘Bola Precoce’ | Yellow | Machine transplanting | No-till, conventional | Millet (*Pennisetum glaucum*) |
| 2012 | 2 | ‘Bola Precoce’  ‘Crioula Alto Vale’ | Yellow  Yellow | Direct seeding | Conventional | Millet (*Pennisetum glaucum*)  Millet (*Pennisetum glaucum*) |
| 2013 | 2 | ‘Bola Precoce’ | Yellow | Direct seeding | Conventional | Millet (*Pennisetum glaucum*) |
| 2014 | 2 | ‘Crioula Alto Vale’ | Yellow | Direct seeding | Conventional | Millet (*Pennisetum glaucum*) |
| 2015 | 1 | ‘Bola Precoce’ | Yellow | Manual transplanting | No-till | Mixture of *Pennisetum glaucum* (30 kg ha-1) and *Vigna unguiculata* (L.) Walp. (40 kg ha-1) |
| 2016 | 4 | ‘Bola Precoce’  ‘Mulata’ | Yellow  Yellow | Direct seeding  Direct seeding | Conventional  No-till | Maize (*Zea Mays*)  Black oat (*Avena sativa*) |
| 2017 | 9 | ‘Omega’  ‘Bola Precoce’ | Yellow  Yellow | Direct seeding  Manual transplanting | No-till, conventional  No-till | Black oat (*Avena sativa*)  Mixture of *Mucuna aterrima* (40 kg ha-1/ha) and *Pennisetum glaucum* (30 kg ha-1) |
| 2018 | 2 | ‘Omega’  ‘Bola Precoce’ | Yellow  Yellow | Direct seeding  Manual transplanting | No-till  No-till | Black oat (*Avena sativa*)  Mixture of *Mucuna aterrima* (40 kg ha-1 ha) and *Pennisetum glaucum* (30 kg ha-1) |
| 2019 | 2 | ‘Omega’  ‘Valessul’ | Yellow  Yellow | Direct seeding  Machine transplanting | No-till  Conventional | Black oat (*Avena sativa*)  Millet (*Pennisetum glaucum*) |
| 2020 | 2 | ‘Valessul’  ‘Caeté’ | Yellow  Purple | Machine transplanting  Direct seeding | No-till, conventional  No-till | Millet (*Pennisetum glaucum*)  Black oat (*Avena* *sativa*) |

Supplementary Material S4. Summary of climatic conditions during the growing season at experimental sites

| Year | Duration | Rainfall | Shannon diversity index | Degree-days > 5°C | Minimum temperature | | Maximum temperature | | Crop |
| --- | --- | --- | --- | --- | --- | --- | --- | --- | --- |
|  |  |  |  |  | minima | maxima | minima | maxima | scouting |
|  | d | mm | unitless | °C | | | | |  |
|  | Ituporanga† and Atalanta‡ experimental sites | | | | | | | |  |
| 2007† | 115 | 604 | 0.66 | 1344 | -0.8 | 21.0 | 10.6 | 31.6 | Normal |
| 2008† | 123 | 835 | 0.77 | 1427 | 0.0 | 19.2 | 13.0 | 32.4 | Rainfall Normal normal or  above average |
| 2009† | 115 | 749 | 0.70 | 1395 | 4.0 | 21.0 | 12.6 | 37.4 | Rainfall above average |
| 2009† | 121 | 796 | 0.70 | 1446 | -0.6 | 21.0 | 10.8 | 37.4 | Rainfall above average |
| 2011† | 120 | 853 | 0.68 | 1382 | -1.8 | 17.4 | 11.2 | 34.6 | Rainfall below average |
| 2011† | 126 | 908 | 0.68 | 1412 | -1.8 | 17.4 | 11.2 | 34.6 | Rainfall below average |
| 2012† | 176 | 670 | 0.69 | 1524 | 0.3 | 21.0 | 11.8 | 31.9 | Rainfall below average |
| 2012† | 181 | 703 | 0.70 | 1684 | 0.3 | 21.0 | 11.8 | 32.8 | Rainfall below average |
| 2013† | 180 | 989 | 0.71 | 1882 | -2.9 | 19.6 | 7.6 | 32.0 | Rainfall below average |
| 2013† | 185 | 992 | 0.71 | 1967 | -2.9 | 19.6 | 7.6 | 33.4 | Rainfall below average |
| 2014† | 181 | 1026 | 0.69 | 2112 | 1.0 | 21.2 | 13.5 | 33.5 | Rainfall above average |
| 2014† | 189 | 1065 | 0.70 | 2248 | 1.0 | 21.2 | 13.5 | 33.5 | Rainfall above average |
| 2015† | 128 | 822 | 0.73 | 1594 | 3.2 | 20.0 | 14.0 | 33.2 | Excessive rainfall |
| 2016‡ | 164 | 646 | 0.68 | 1687 | -2.0 | 19.0 | 13.2 | 30.9 | Normal |
| 2017† | 108 | 331 | 0.63 | 1311 | -0.8 | 19.6 | 13.7 | 33.5 | Normal |
| 2018† | 125 | 470 | 0.68 | 1442 | 0.8 | 18.8 | 13.3 | 30.7 | Normal |
| 2019† | 109 | 361 | 0.71 | 1365 | -0.4 | 20.4 | 13.3 | 36.3 | Rainfall below average, hail |
| 2020† | 123 | 378 | 0.74 | 1501 | 1.6 | 20.5 | 11.9 | 31.5 | Rainfall below average |
| 2020† | 125 | 399 | 0.75 | 1516 | 1.6 | 20.5 | 11.9 | 31.5 | Rainfall below average |
|  | Lebon Regis¶ and Caçadorϯ experimental sites | | | | | | | |  |
| 2016¶ | 158 | 715 | 0.72 | 1624 | -4.2 | 19.0 | 8.6 | 31.2 | Normal |
| 2017¶ | 157 | 563 | 0.69 | 1857 | 0.1 | 19.1 | 13.7 | 31.7 | Normal |
| 2017ϯ | 163 | 543 | 0.67 | 1826 | -2.9 | 18.8 | 8.3 | 31.7 | Normal |
| 2018¶ | 156 | 570 | 0.71 | 1738 | -0.5 | 19.0 | 9.1 | 31.6 | Normal |
| 2019¶ | 156 | 444 | 0.66 | 1880 | -2.3 | 20.9 | 9.0 | 34.0 | Normal |
| 2020¶ | 161 | 510 | 0.68 | 1842 | -4.6 | 19.0 | 8.8 | 35.2 | Normal |
